# Supplementary material
Source: Springer Nature journal article supplement (https://www.springermedizin.de/resource/supplementary/12882_2014_869_MOESM6_ESM.pdf/9454476)

(A) Ki67 with PAS staining

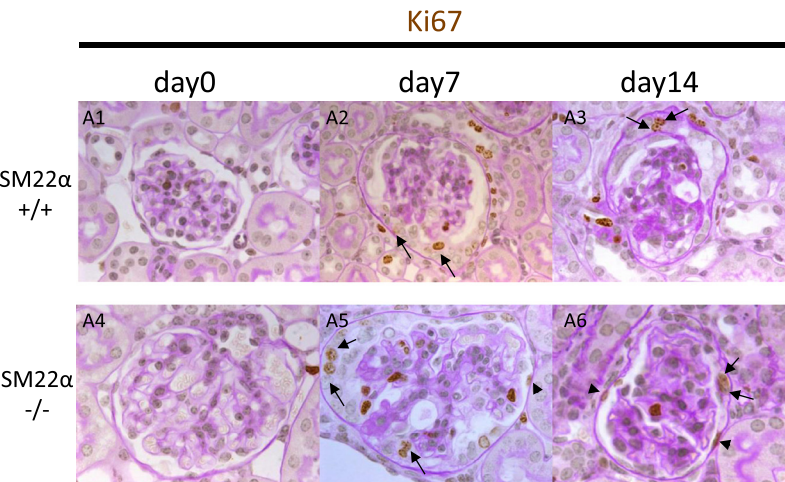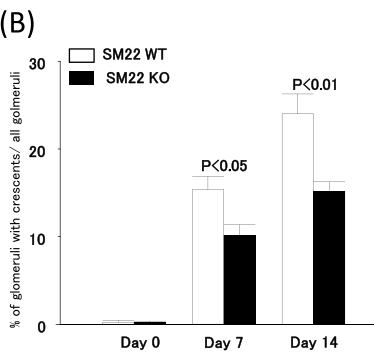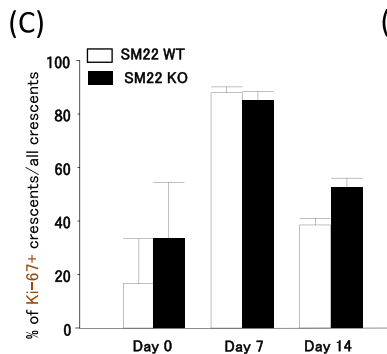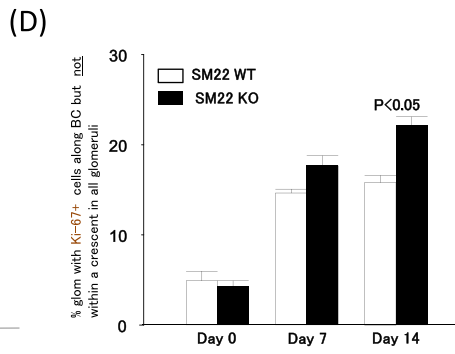

Supplement: MOESM6 [file 9454476]
